# Supplementary material
Source: ML conference proceedings conference paper supplement (https://proceedings.mlr.press/v139/chledowski21a.html)
Supplement: Supplementary file [file chledowski21a-supp.pdf]

## A. Supplementary material

**Additional information about experiments.** We ran the total of 53 trainings and evaluations. All but two runs described below were run for 20 000 steps, with evaluation every 5000 steps.

For datasets from {astar, bwaves, bzip, cactusadm, gems, leslie3d, omnetpp, sphinx3}, we ran 4 experiments on the first 0.1%, 1%, 10% and 100% records of the dataset.

For datasets from {lbn, libq, milc, xalanc} we ran only two experiments, on 1% and 100% of the dataset.

For the mcf dataset, we ran 11 experiments in total. The first five of them were runs on 0.01%, 0.1%, 1%, 10% and 100% of the dataset, without DAgger. For comparison, we ran additional six experiments with a larger number of steps and with DAgger. We achieved comparable cache hit rates, and therefore we did not evaluate learning-augmented algorithms on that additional data.

On average, each experiment took around one day on a Tesla V100 GPU, occupying at most 3GB of the GPU memory.

**Full results.** We present the full cache hit rates of PARROT-REUSE across all evaluated datasets and fractions in Table 3. The raw unnormalized competitive ratios are shown in Table 4.

Robust Learning-Augmented Caching: An Experimental Study

Table 3. Cache hit rates of PARROT-CACHE. Detailed results.

| DATASET   | FRACTION | DAGGER | STEPS  | EVAL FREQ | CACHE REQUESTS | CACHE REQUESTS IN TRAIN SET | HIT RATE CKPT 0 ON VAL | BEST NON 0 CHECKPOINT | HIT RATE CKPT BEST ON VAL | LAST CHECKPOINT | HIT RATE CKPT LAST ON VAL | HIT RATE CKPT BEST NON 0 ON TEST |
|-----------|----------|--------|--------|-----------|----------------|-----------------------------|------------------------|-----------------------|---------------------------|-----------------|---------------------------|----------------------------------|
| ASTAR     | 0.1%     | FALSE  | 20001  | 5000      | 640,032        | 1,154                       | 8.25%                  | 5000                  | 13.32%                    | 20000           | 11.83%                    | 14.05%                           |
| ASTAR     | 1%       | FALSE  | 20001  | 5000      | 640,032        | 11,540                      | 8.25%                  | 5000                  | 25.09%                    | 20000           | 24.55%                    | 25.75%                           |
| ASTAR     | 10%      | FALSE  | 20001  | 5000      | 640,032        | 115,404                     | 8.25%                  | 10000                 | 30.26%                    | 20000           | 30.05%                    | 30.99%                           |
| ASTAR     | 100%     | FALSE  | 20001  | 5000      | 640,032        | 1,154,048                   | 8.25%                  | 20000                 | 31.53%                    | 20000           | 31.53%                    | 32.17%                           |
| BWAVES    | 0.1%     | FALSE  | 20001  | 5000      | 640,032        | 570                         | 0.02%                  | 5000                  | 0.03%                     | 20000           | 0.02%                     | 0.00%                            |
| BWAVES    | 1%       | FALSE  | 20001  | 5000      | 640,032        | 5,703                       | 0.02%                  | 10000                 | 1.93%                     | 20000           | 1.62%                     | 0.30%                            |
| BWAVES    | 10%      | FALSE  | 20001  | 5000      | 640,032        | 57,036                      | 0.02%                  | 20000                 | 0.03%                     | 20000           | 0.03%                     | 0.00%                            |
| BWAVES    | 100%     | FALSE  | 20001  | 5000      | 640,032        | 570,368                     | 0.02%                  | 10000                 | 3.21%                     | 20000           | 1.21%                     | 0.32%                            |
| BZIP      | 0.1%     | FALSE  | 20001  | 5000      | 640,032        | 167                         | 52.05%                 | 20000                 | 48.02%                    | 20000           | 48.02%                    | 53.23%                           |
| BZIP      | 1%       | FALSE  | 20001  | 5000      | 640,032        | 1,676                       | 52.05%                 | 5000                  | 42.69%                    | 20000           | 41.94%                    | 45.12%                           |
| BZIP      | 10%      | FALSE  | 20001  | 5000      | 640,032        | 16,768                      | 52.05%                 | 5000                  | 57.09%                    | 20000           | 52.84%                    | 64.28%                           |
| BZIP      | 100%     | FALSE  | 20001  | 5000      | 640,032        | 167,680                     | 52.05%                 | 5000                  | 63.50%                    | 20000           | 61.29%                    | 68.44%                           |
| CACTUSADM | 0.1%     | FALSE  | 20001  | 5000      | 640,032        | 221                         | 0.32%                  | 20000                 | 4.81%                     | 20000           | 4.81%                     | 0.45%                            |
| CACTUSADM | 1%       | FALSE  | 20001  | 5000      | 640,032        | 2,219                       | 0.32%                  | 15000                 | 8.43%                     | 20000           | 8.42%                     | 20.16%                           |
| CACTUSADM | 10%      | FALSE  | 20001  | 5000      | 640,032        | 22,195                      | 0.32%                  | 5000                  | 25.88%                    | 20000           | 24.17%                    | 30.93%                           |
| CACTUSADM | 100%     | FALSE  | 20001  | 5000      | 640,032        | 221,952                     | 0.32%                  | 5000                  | 25.30%                    | 20000           | 24.98%                    | 32.97%                           |
| GEMS      | 0.1%     | FALSE  | 20001  | 5000      | 640,032        | 723                         | 2.96%                  | 15000                 | 3.14%                     | 20000           | 3.11%                     | 3.09%                            |
| GEMS      | 1%       | FALSE  | 20001  | 5000      | 640,032        | 7,234                       | 2.96%                  | 20000                 | 3.12%                     | 20000           | 3.12%                     | 3.09%                            |
| GEMS      | 10%      | FALSE  | 20001  | 5000      | 640,032        | 72,345                      | 2.96%                  | 20000                 | 3.13%                     | 20000           | 3.13%                     | 3.08%                            |
| GEMS      | 100%     | FALSE  | 20001  | 5000      | 640,032        | 723,456                     | 2.96%                  | 20000                 | 1.77%                     | 20000           | 1.77%                     | 3.10%                            |
| LBM       | 1%       | FALSE  | 20001  | 5000      | 640,032        | 7,820                       | 0.02%                  | 5000                  | 0.19%                     | 20000           | 0.13%                     | 0.00%                            |
| LBM       | 100%     | FALSE  | 20001  | 5000      | 640,032        | 782,080                     | 0.02%                  | 5000                  | 1.22%                     | 20000           | 0.29%                     | 0.00%                            |
| LESLIE3D  | 0.1%     | FALSE  | 20001  | 5000      | 640,032        | 716                         | 0.81%                  | 15000                 | 1.29%                     | 20000           | 1.01%                     | 9.10%                            |
| LESLIE3D  | 1%       | FALSE  | 20001  | 5000      | 640,032        | 7,160                       | 0.81%                  | 5000                  | 1.62%                     | 20000           | 1.21%                     | 9.31%                            |
| LESLIE3D  | 10%      | FALSE  | 20001  | 5000      | 640,032        | 71,603                      | 0.81%                  | 5000                  | 2.09%                     | 20000           | 1.00%                     | 11.73%                           |
| LESLIE3D  | 100%     | FALSE  | 20001  | 5000      | 640,032        | 716,032                     | 0.81%                  | 5000                  | 4.99%                     | 20000           | 4.89%                     | 11.41%                           |
| LIBQ      | 1%       | FALSE  | 20001  | 5000      | 640,032        | 5,798                       | 0.00%                  | 5000                  | 0.00%                     | 20000           | 0.00%                     | 0.00%                            |
| LIBQ      | 100%     | FALSE  | 20001  | 5000      | 640,032        | 579,840                     | 0.00%                  | 10000                 | 0.01%                     | 20000           | 0.00%                     | 0.01%                            |
| MCF       | 0.01%    | FALSE  | 20001  | 5000      | 640,032        | 296                         | 2.61%                  | 5000                  | 15.79%                    | 20000           | 11.02%                    | 15.27%                           |
| MCF       | 0.01%    | TRUE   | 20001  | 5000      | 640,032        | 296                         | 2.61%                  | 5000                  | 15.79%                    | 20000           | 11.02%                    | 15.28%                           |
| MCF       | 0.1%     | FALSE  | 20001  | 5000      | 640,032        | 2,965                       | 2.61%                  | 15000                 | 22.19%                    | 20000           | 22.16%                    | 27.33%                           |
| MCF       | 0.1%     | TRUE   | 20001  | 5000      | 640,032        | 2,965                       | 2.61%                  | 10000                 | 21.64%                    | 20000           | 21.40%                    | 27.02%                           |
| MCF       | 1%       | FALSE  | 20001  | 5000      | 640,032        | 29,655                      | 2.61%                  | 5000                  | 40.00%                    | 20000           | 39.44%                    | 41.31%                           |
| MCF       | 1%       | TRUE   | 20001  | 5000      | 640,032        | 29,655                      | 2.61%                  | 5000                  | 40.35%                    | 20000           | 39.93%                    | 41.42%                           |
| MCF       | 10%      | FALSE  | 20001  | 5000      | 640,032        | 296,550                     | 2.61%                  | 5000                  | 42.09%                    | 20000           | 41.49%                    | 43.45%                           |
| MCF       | 100%     | FALSE  | 20001  | 5000      | 640,032        | 2,965,504                   | 2.61%                  | 20000                 | 43.05%                    | 20000           | 43.05%                    | 43.89%                           |
| MCF       | 100%     | TRUE   | 20001  | 5000      | 640,032        | 2,965,504                   | 2.61%                  | 15000                 | 42.65%                    | 20000           | 42.49%                    | 43.46%                           |
| MCF       | 100%     | FALSE  | 120001 | 30000     | 3,840,032      | 2,965,504                   | 2.61%                  | 30000                 | 43.10%                    | 120000          | 43.10%                    | 43.89%                           |
| MCF       | 100%     | TRUE   | 120001 | 30000     | 3,840,032      | 2,965,504                   | 2.61%                  | 30000                 | 42.60%                    | 120000          | 42.60%                    | 43.11%                           |
| MILC      | 1%       | FALSE  | 20001  | 5000      | 640,032        | 5,568                       | 0.22%                  | 10000                 | 0.23%                     | 20000           | 0.23%                     | 0.01%                            |
| MILC      | 100%     | FALSE  | 20001  | 5000      | 640,032        | 556,800                     | 0.22%                  | 5000                  | 0.34%                     | 20000           | 0.23%                     | 0.01%                            |
| OMNETPP   | 0.1%     | FALSE  | 20001  | 5000      | 640,032        | 555                         | 8.24%                  | 5000                  | 16.92%                    | 20000           | 16.60%                    | 17.90%                           |
| OMNETPP   | 1%       | FALSE  | 20001  | 5000      | 640,032        | 5,555                       | 8.24%                  | 10000                 | 13.85%                    | 20000           | 13.62%                    | 16.85%                           |
| OMNETPP   | 10%      | FALSE  | 20001  | 5000      | 640,032        | 55,552                      | 8.24%                  | 5000                  | 18.60%                    | 20000           | 14.83%                    | 19.28%                           |
| OMNETPP   | 100%     | FALSE  | 20001  | 5000      | 640,032        | 555,520                     | 8.24%                  | 5000                  | 22.23%                    | 20000           | 15.46%                    | 21.91%                           |
| SPHINX3   | 0.1%     | FALSE  | 20001  | 5000      | 640,032        | 328                         | 36.60%                 | 20000                 | 36.33%                    | 20000           | 36.33%                    | 53.78%                           |
| SPHINX3   | 1%       | FALSE  | 20001  | 5000      | 640,032        | 3,287                       | 36.60%                 | 5000                  | 43.84%                    | 20000           | 42.71%                    | 59.48%                           |
| SPHINX3   | 10%      | FALSE  | 20001  | 5000      | 640,032        | 32,870                      | 36.60%                 | 5000                  | 45.68%                    | 20000           | 45.49%                    | 66.55%                           |
| SPHINX3   | 100%     | FALSE  | 20001  | 5000      | 640,032        | 328,704                     | 36.60%                 | 20000                 | 55.18%                    | 20000           | 55.18%                    | 70.54%                           |
| XALANC    | 1%       | FALSE  | 20001  | 5000      | 640,032        | 691                         | 14.73%                 | 15000                 | 15.02%                    | 20000           | 14.46%                    | 32.38%                           |
| XALANC    | 100%     | FALSE  | 20001  | 5000      | 640,032        | 69,120                      | 14.73%                 | 5000                  | 27.01%                    | 20000           | 26.42%                    | 49.71%                           |

**Robust Learning-Augmented Caching: An Experimental Study**

*Table 4. Competitive ratios. Detailed results.*

| <b>DATASET</b> | <b>FRACTION</b> | <b>OPT</b> | <b>LRU</b> | <b>MARKER</b> | <b>RANDOM</b> | <b>PARROT-REUSE</b> | <b>PREDICTIVEMARKER</b> | <b>LMARKER</b> | <b>LNONMARKERR</b> | <b>LNONMARKERD</b> | <b>BLINDORACLER</b> | <b>BLINDORACLED</b> | <b>PARROT-CACHE</b> | <b>TRUST&amp;DOUBT</b> | <b>ROBUSTFTPR</b> | <b>ROBUSTFTPD</b> |
|----------------|-----------------|------------|------------|---------------|---------------|---------------------|-------------------------|----------------|--------------------|--------------------|---------------------|---------------------|---------------------|------------------------|-------------------|-------------------|
| ASTAR          | 0.1%            | 1.00       | 1.53       | 1.52          | 1.47          | 1.26                | 1.51                    | 1.51           | 1.51               | 1.51               | 1.32                | 1.27                | 1.37                | 1.53                   | 1.42              | 1.38              |
| ASTAR          | 1%              | 1.00       | 1.53       | 1.52          | 1.47          | 1.16                | 1.50                    | 1.50           | 1.50               | 1.49               | 1.22                | 1.17                | 1.19                | 1.47                   | 1.24              | 1.19              |
| ASTAR          | 10%             | 1.00       | 1.53       | 1.52          | 1.47          | 1.15                | 1.50                    | 1.50           | 1.50               | 1.49               | 1.19                | 1.15                | 1.10                | 1.45                   | 1.14              | 1.11              |
| ASTAR          | 100%            | 1.00       | 1.53       | 1.52          | 1.46          | 1.14                | 1.50                    | 1.50           | 1.50               | 1.49               | 1.19                | 1.14                | 1.08                | 1.45                   | 1.14              | 1.09              |
| BWAVES         | 0.1%            | 1.00       | 1.05       | 1.05          | 1.05          | 1.05                | 1.05                    | 1.05           | 1.05               | 1.05               | 1.05                | 1.05                | 1.05                | 1.05                   | 1.05              | 1.05              |
| BWAVES         | 1%              | 1.00       | 1.05       | 1.05          | 1.05          | 1.05                | 1.05                    | 1.05           | 1.05               | 1.05               | 1.05                | 1.05                | 1.05                | 1.05                   | 1.05              | 1.05              |
| BWAVES         | 10%             | 1.00       | 1.05       | 1.05          | 1.05          | 1.05                | 1.05                    | 1.05           | 1.05               | 1.05               | 1.05                | 1.05                | 1.05                | 1.05                   | 1.05              | 1.05              |
| BWAVES         | 100%            | 1.00       | 1.05       | 1.05          | 1.05          | 1.05                | 1.05                    | 1.05           | 1.05               | 1.05               | 1.05                | 1.05                | 1.05                | 1.05                   | 1.05              | 1.05              |
| BZIP           | 0.1%            | 1.00       | 1.88       | 1.93          | 2.23          | 2.96                | 2.00                    | 1.98           | 2.00               | 1.97               | 2.36                | 1.92                | 2.43                | 2.00                   | 2.17              | 1.98              |
| BZIP           | 1%              | 1.00       | 1.88       | 1.96          | 2.22          | 2.92                | 1.98                    | 1.97           | 1.98               | 1.98               | 2.26                | 1.92                | 2.85                | 2.03                   | 2.32              | 2.00              |
| BZIP           | 10%             | 1.00       | 1.88       | 1.93          | 2.26          | 2.39                | 1.93                    | 1.93           | 1.97               | 1.95               | 2.12                | 1.92                | 1.86                | 1.81                   | 1.90              | 1.84              |
| BZIP           | 100%            | 1.00       | 1.88       | 1.94          | 2.26          | 2.19                | 1.94                    | 1.94           | 1.98               | 1.96               | 2.06                | 1.92                | 1.64                | 1.69                   | 1.78              | 1.66              |
| CACTUSADM      | 0.1%            | 1.00       | 1.51       | 1.49          | 1.44          | 1.46                | 1.47                    | 1.47           | 1.48               | 1.47               | 1.48                | 1.47                | 1.50                | 1.51                   | 1.49              | 1.50              |
| CACTUSADM      | 1%              | 1.00       | 1.51       | 1.49          | 1.44          | 1.36                | 1.46                    | 1.46           | 1.47               | 1.47               | 1.42                | 1.37                | 1.20                | 1.46                   | 1.34              | 1.22              |
| CACTUSADM      | 10%             | 1.00       | 1.51       | 1.49          | 1.44          | 1.19                | 1.45                    | 1.45           | 1.47               | 1.45               | 1.33                | 1.20                | 1.04                | 1.40                   | 1.21              | 1.05              |
| CACTUSADM      | 100%            | 1.00       | 1.51       | 1.49          | 1.44          | 1.18                | 1.44                    | 1.44           | 1.46               | 1.45               | 1.31                | 1.19                | 1.01                | 1.40                   | 1.15              | 1.02              |
| GEMS           | 0.1%            | 1.00       | 1.11       | 1.09          | 1.09          | 1.13                | 1.09                    | 1.09           | 1.09               | 1.09               | 1.11                | 1.11                | 1.10                | 1.10                   | 1.10              | 1.09              |
| GEMS           | 1%              | 1.00       | 1.11       | 1.09          | 1.10          | 1.13                | 1.09                    | 1.09           | 1.09               | 1.09               | 1.11                | 1.11                | 1.10                | 1.10                   | 1.10              | 1.09              |
| GEMS           | 10%             | 1.00       | 1.11       | 1.09          | 1.09          | 1.13                | 1.08                    | 1.09           | 1.09               | 1.09               | 1.11                | 1.11                | 1.10                | 1.10                   | 1.10              | 1.09              |
| GEMS           | 100%            | 1.00       | 1.11       | 1.09          | 1.10          | 1.13                | 1.09                    | 1.09           | 1.09               | 1.09               | 1.11                | 1.11                | 1.10                | 1.10                   | 1.10              | 1.09              |
| LBM            | 1%              | 1.00       | 1.33       | 1.33          | 1.30          | 1.32                | 1.33                    | 1.33           | 1.33               | 1.33               | 1.33                | 1.33                | 1.33                | 1.33                   | 1.33              | 1.33              |
| LBM            | 100%            | 1.00       | 1.33       | 1.33          | 1.30          | 1.32                | 1.33                    | 1.33           | 1.33               | 1.33               | 1.33                | 1.33                | 1.33                | 1.33                   | 1.33              | 1.33              |
| LESLIE3D       | 0.1%            | 1.00       | 1.31       | 1.31          | 1.31          | 1.39                | 1.32                    | 1.32           | 1.32               | 1.32               | 1.34                | 1.32                | 1.32                | 1.32                   | 1.31              | 1.31              |
| LESLIE3D       | 1%              | 1.00       | 1.31       | 1.31          | 1.31          | 1.39                | 1.31                    | 1.31           | 1.31               | 1.31               | 1.34                | 1.32                | 1.31                | 1.31                   | 1.31              | 1.31              |
| LESLIE3D       | 10%             | 1.00       | 1.31       | 1.31          | 1.31          | 1.37                | 1.31                    | 1.31           | 1.31               | 1.31               | 1.33                | 1.32                | 1.28                | 1.30                   | 1.29              | 1.28              |
| LESLIE3D       | 100%            | 1.00       | 1.31       | 1.31          | 1.31          | 1.38                | 1.31                    | 1.31           | 1.31               | 1.31               | 1.33                | 1.32                | 1.28                | 1.30                   | 1.30              | 1.29              |
| LIBQ           | 1%              | 1.00       | 1.06       | 1.06          | 1.06          | 1.00                | 1.06                    | 1.06           | 1.06               | 1.06               | 1.02                | 1.01                | 1.06                | 1.06                   | 1.06              | 1.06              |
| LIBQ           | 100%            | 1.00       | 1.06       | 1.06          | 1.06          | 1.00                | 1.06                    | 1.06           | 1.06               | 1.06               | 1.03                | 1.01                | 1.06                | 1.06                   | 1.06              | 1.06              |
| MCF            | 0.01%           | 1.00       | 1.32       | 1.36          | 1.43          | 1.72                | 1.34                    | 1.34           | 1.35               | 1.35               | 1.37                | 1.32                | 1.53                | 1.50                   | 1.36              | 1.34              |
| MCF            | 0.1%            | 1.00       | 1.32       | 1.35          | 1.43          | 1.58                | 1.31                    | 1.32           | 1.33               | 1.32               | 1.37                | 1.32                | 1.31                | 1.26                   | 1.29              | 1.28              |
| MCF            | 1%              | 1.00       | 1.32       | 1.35          | 1.43          | 1.29                | 1.26                    | 1.26           | 1.28               | 1.26               | 1.27                | 1.26                | 1.06                | 1.21                   | 1.08              | 1.06              |
| MCF            | 10%             | 1.00       | 1.32       | 1.36          | 1.43          | 1.22                | 1.25                    | 1.25           | 1.27               | 1.24               | 1.21                | 1.20                | 1.02                | 1.20                   | 1.05              | 1.02              |
| MCF            | 100%            | 1.00       | 1.32       | 1.36          | 1.43          | 1.22                | 1.25                    | 1.25           | 1.26               | 1.25               | 1.22                | 1.20                | 1.01                | 1.20                   | 1.03              | 1.01              |
| MILC           | 1%              | 1.00       | 1.01       | 1.01          | 1.01          | 1.00                | 1.01                    | 1.01           | 1.01               | 1.01               | 1.01                | 1.01                | 1.01                | 1.01                   | 1.01              | 1.01              |
| MILC           | 100%            | 1.00       | 1.01       | 1.01          | 1.01          | 1.00                | 1.01                    | 1.01           | 1.01               | 1.01               | 1.01                | 1.01                | 1.01                | 1.01                   | 1.01              | 1.01              |
| OMNETPP        | 0.1%            | 1.00       | 1.38       | 1.39          | 1.43          | 1.56                | 1.38                    | 1.38           | 1.39               | 1.39               | 1.44                | 1.39                | 1.43                | 1.39                   | 1.40              | 1.39              |
| OMNETPP        | 1%              | 1.00       | 1.38       | 1.39          | 1.43          | 1.56                | 1.38                    | 1.38           | 1.39               | 1.39               | 1.44                | 1.39                | 1.44                | 1.42                   | 1.41              | 1.40              |
| OMNETPP        | 10%             | 1.00       | 1.38       | 1.39          | 1.43          | 1.55                | 1.38                    | 1.38           | 1.39               | 1.38               | 1.45                | 1.39                | 1.40                | 1.40                   | 1.40              | 1.39              |
| OMNETPP        | 100%            | 1.00       | 1.38       | 1.39          | 1.43          | 1.53                | 1.38                    | 1.38           | 1.39               | 1.38               | 1.46                | 1.39                | 1.36                | 1.37                   | 1.37              | 1.35              |
| SPHINX3        | 0.1%            | 1.00       | 3.46       | 2.29          | 1.87          | 1.43                | 1.56                    | 1.59           | 1.93               | 1.68               | 1.69                | 1.44                | 1.83                | 2.09                   | 2.00              | 1.86              |
| SPHINX3        | 1%              | 1.00       | 3.46       | 2.30          | 1.88          | 1.40                | 1.84                    | 1.92           | 1.98               | 1.85               | 1.62                | 1.41                | 1.60                | 1.87                   | 1.82              | 1.62              |
| SPHINX3        | 10%             | 1.00       | 3.46       | 2.30          | 1.87          | 1.36                | 1.58                    | 1.65           | 1.89               | 1.66               | 1.59                | 1.37                | 1.32                | 1.63                   | 1.69              | 1.33              |
| SPHINX3        | 100%            | 1.00       | 3.46       | 2.3           | 1.88          | 1.28                | 1.52                    | 1.56           | 1.87               | 1.61               | 1.63                | 1.29                | 1.16                | 1.47                   | 1.46              | 1.17              |
| XALANC         | 1%              | 1.00       | 1.27       | 1.32          | 1.48          | 1.87                | 1.34                    | 1.34           | 1.34               | 1.33               | 1.61                | 1.30                | 1.56                | 1.37                   | 1.42              | 1.34              |
| XALANC         | 100%            | 1.00       | 1.27       | 1.32          | 1.47          | 1.45                | 1.29                    | 1.28           | 1.31               | 1.30               | 1.38                | 1.29                | 1.17                | 1.17                   | 1.23              | 1.19              |
